# Supplementary material
Source: MDPI journal article supplement (https://www.mdpi.com/2073-4344/12/9/1023)
Supplement: s1 [file s1]

Supplementary Materials

# Iron Carbide Nanoparticles Embedded in Edge-Rich, N and F Codoped Graphene/Carbon Nanotubes Hybrid for Oxygen Electrocatalysis

Xiaochang Qiao <sup>1,2,\*</sup>, Yijie Deng <sup>3</sup>, Xiaochang Cao <sup>4</sup>, Jiafeng Wu <sup>1</sup>, Hui Guo <sup>1</sup>, Wenhua Xiao <sup>1</sup> and Shijun Liao <sup>2,\*</sup>

<sup>1</sup> School of Materials Science and Engineering, Dongguan University of Technology, Dongguan 523808, China

<sup>2</sup> The Key Laboratory of Fuel Cell Technology of Guangdong Province, School of Chemistry and Chemical Engineering, South China University of Technology, Guangzhou 510641, China

<sup>3</sup> School of Resource Environmental and Safety Engineering, University of South China, Hengyang 421001, China

<sup>4</sup> School of Mechanical Engineering, Dongguan University of Technology, Dongguan, 523808, China

\* Correspondence: qiaoxc@dgut.edu.cn(X.Q.); chsjliao@scut.edu.cn(S.L.); Tel.: +86-20-871-1358 (S.L.)

**Citation:** Qiao, X.; Deng, Y.; Cao, X.; Wu, J.; Guo, H.; Xiao, W.; Liao, S. Iron Carbide Nanoparticles Embedded in Edge-Rich, N and F Codoped Graphene/Carbon Nanotubes Hybrid for Oxygen Electrocatalysis. *Catalysts* **2022**, *12*, 1023. <https://doi.org/10.3390/catal12091023>

Academic Editors: Jose Luis Diaz de Tuesta and Helder T. Gomes

Received: 10 August 2022

Accepted: 6 September 2022

Published: 9 September 2022

**Publisher's Note:** MDPI stays neutral with regard to jurisdictional claims in published maps and institutional affiliations.

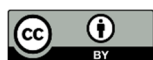

**Copyright:** © 2022 by the authors. Licensee MDPI, Basel, Switzerland. This article is an open access article distributed under the terms and conditions of the Creative Commons Attribution (CC BY) license (<https://creativecommons.org/licenses/by/4.0/>).

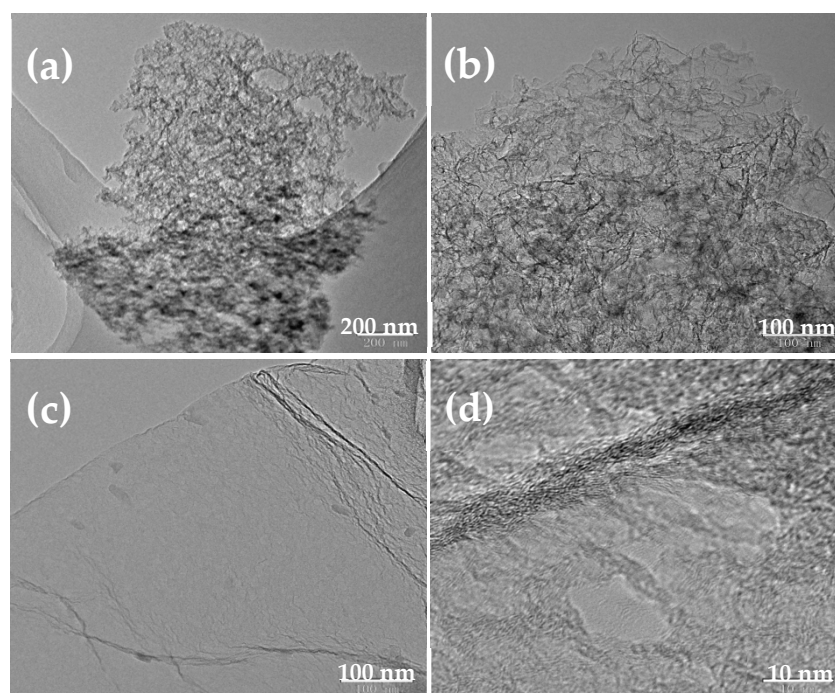

**Figure S1.** TEM images of Fe-F-C (a, b) and N-F-C (c, d).

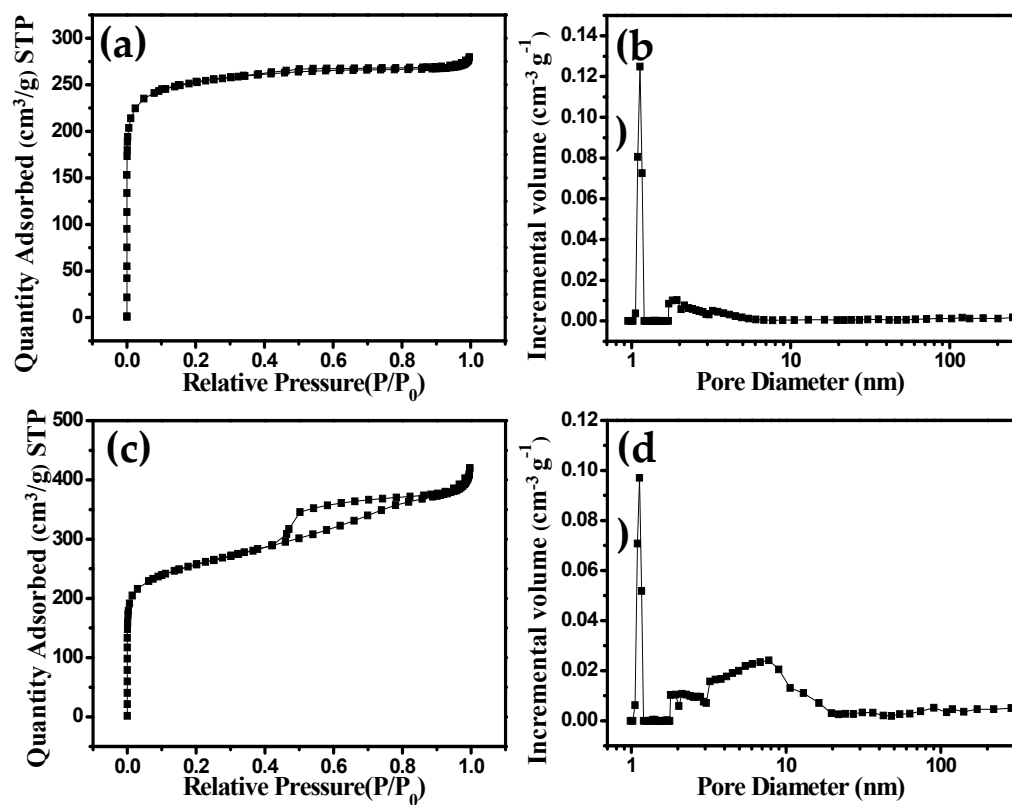

Figure S2. Nitrogen adsorption–desorption isotherms and pore-size distribution curve of N-F-C and Fe-F-C.

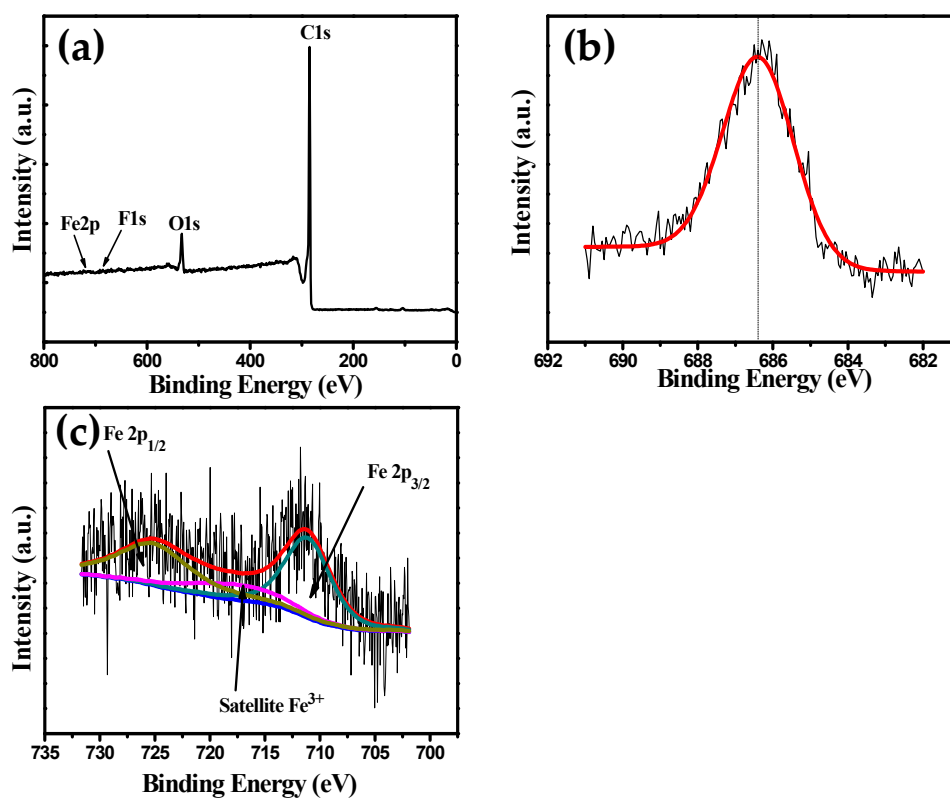

Figure S3. XPS results for Fe-F-C: survey scan (a), high resolution deconvoluted spectra for F 1s (b), and Fe 2p (c).

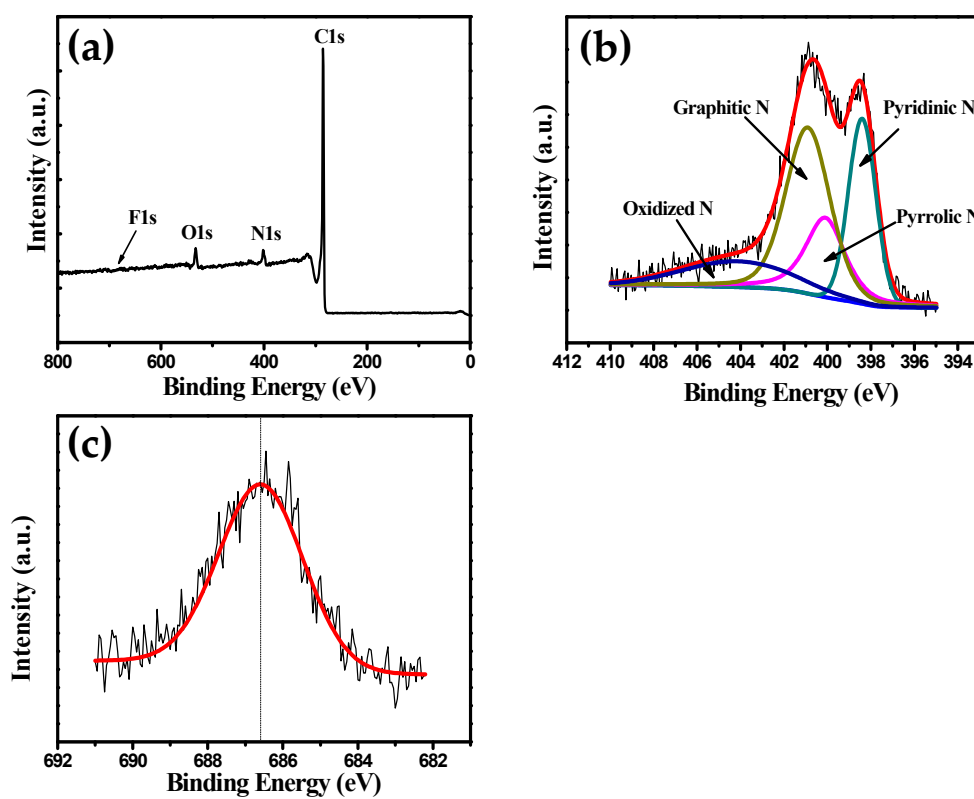

**Figure S4.** XPS results for N-F-C: survey scan (a), high resolution deconvoluted spectra for N 1s (b), and F 1s (c).

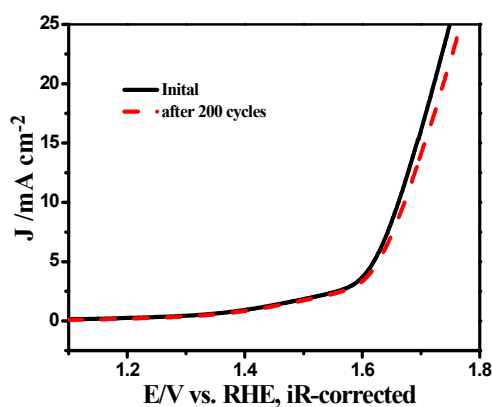

**Figure S5.** OER LSV plots of Fe<sub>3</sub>C@N-F-GCNTs before and after a potential cycling of 200 cycles (c).

**Table S1.** Surface composition of Fe<sub>3</sub>C@N-F-GCNTs, Fe-F-C and N-F-C calculated from XPS results.

| Catalyst                    | Species concentration (at%) |      |      |      |      |
|-----------------------------|-----------------------------|------|------|------|------|
|                             | C                           | O    | N    | F    | Fe   |
| Fe <sub>3</sub> C@N-F-GCNTs | 91.87                       | 3.2  | 3.79 | 0.72 | 0.42 |
| Fe-F-C                      | 91.61                       | 7.10 | –    | 0.90 | 0.39 |
| N-F-C                       | 89.71                       | 3.41 | 6.08 | 0.80 | –    |

**Table S2.** Distribution of each N species, obtained from the fitting results of N 1s XPS spectra (normalized to the surface N atoms of each material).

| Catalyst                    | Species concentration (at%) |            |             |            |
|-----------------------------|-----------------------------|------------|-------------|------------|
|                             | Pyridinic N                 | Pyrrolic N | Graphitic N | Oxidized N |
| Fe <sub>3</sub> C@N-F-GCNTs | 25.61                       | 12.60      | 40.85       | 20.94      |
| N-F-C                       | 25.14                       | 20.13      | 40.53       | 14.20      |

**Table S3.** Comparison of ORR and OER activity parameters with other recently reported highly active non-noble metal bifunctional electrocatalysts.

| Catalyst                                | C <sub>KOH</sub> | rotating<br>rate (rpm) | E <sub>J3</sub> /E <sub>h<sub>afe</sub></sub> -<br>wave,ORR (V) | E <sub>J10,OR</sub><br>(V) | ΔE(E <sub>J10,OR</sub> -<br>E <sub>J3</sub> /E <sub>h<sub>afe</sub></sub> -wave,<br>ORR) | Literature |
|-----------------------------------------|------------------|------------------------|-----------------------------------------------------------------|----------------------------|------------------------------------------------------------------------------------------|------------|
| Fe <sub>3</sub> C@N-F-GCNTs             | 0.1 M            | 1600                   | 0.846                                                           | 1.662                      | 0.816                                                                                    | this study |
| Co <sub>9</sub> S <sub>8</sub> @TDC-900 | 0.1 M            | 1600                   | 0.78                                                            | 1.56                       | 0.78                                                                                     | [10]       |
| S/N-Fe-27                               | 0.1 M            | 1500                   | 0.87                                                            | 1.78                       | 0.91                                                                                     | [36]       |
| Fe <sub>3</sub> C@Fe,N,S-GCM            | 0.1 M            | 1600                   | 0.779                                                           | 1.557                      | 0.778                                                                                    | [37]       |
| CoMnO@CNT/CNF                           | 0.1 M            | 1600                   | 0.82                                                            | 1.60                       | 0.78                                                                                     | [38]       |
| Co-N/PC@CNT                             | 0.1 M            | 1600                   | 0.78                                                            | 1.63                       | 0.86                                                                                     | [39]       |
| Fe <sub>3</sub> C@C-NGns-NCNTs          | 0.1 M            | 1600                   | 0.855                                                           | 1.642                      | 0.787                                                                                    | [40]       |
| Fe <sub>3</sub> C@NG800-0.2             | 0.1 M            | 1600                   | 0.81                                                            | 1.59                       | 0.78                                                                                     | [41]       |

**Table S4.** Comparison of the power density for Zn-air batteries.

| Catalyst                                  | Power density<br>mW·cm <sup>-2</sup> | References                                         |
|-------------------------------------------|--------------------------------------|----------------------------------------------------|
| Fe <sub>3</sub> C@N-F-GCNTs               | 130.0                                | this study                                         |
| Fe-NP-WB-3                                | 92.9                                 | J Energy Chem 2021;55:572-579 [42]                 |
| Fe <sub>3</sub> N@N-C                     | 87.5                                 | Carbon 2019;153:364-371 [43]                       |
| CoFeNi-CNTs                               | 138.7                                | J Alloy Compd 2022;910 [44]                        |
| C-FeZIF-8@g-C <sub>3</sub> N <sub>4</sub> | 121                                  | Chem Eng J 2020;390 [45]                           |
| NDGs-800                                  | 115.2                                | ACS Energy Letters 2018;3(5):1183-1191 [46]        |
| NPC-Fe <sub>0.3</sub>                     | 99                                   | Chinese Chemical Letters 2022;33(4):2171-2177 [47] |

## Reference

1. Li, Z.; Gao, Q.; Liang, X.; Zhang, H.; Xiao, H.; Xu, P.; Liu, Z. Low content of Fe<sub>3</sub>C anchored on Fe,N,S-codoped graphene-like carbon as bifunctional electrocatalyst for oxygen reduction and oxygen evolution reactions. *Carbon* **2019**, *150*, 93–100, doi:10.1016/j.carbon.2019.05.012.
2. Zhao, J.Y.; Wang, R.; Wang, S.; Lv, Y.R.; Xu, H.; Zang, S.Q. Metal-organic framework-derived Co<sub>9</sub>S<sub>8</sub> embedded in N, O and S-tridoped carbon nanomaterials as an efficient oxygen bifunctional electrocatalyst. *J. Mater. Chem. A* **2019**, *7*, 7389–7395. <https://doi.org/10.1039/c8ta12116h>.
3. Ranjbar Sahraie, N.; Paraknowitsch, J.P.; Göbel, C.; Thomas, A.; Strasser, P. Noble-Metal-Free Electrocatalysts with Enhanced ORR Performance by Task-Specific Functionalization of Carbon using Ionic Liquid Precursor Systems. *J. Am. Chem. Soc.* **2014**, *136*, 14486–14497. <https://doi.org/10.1021/ja506553r>.
4. Tian, G.L.; Zhang, Q.; Zhang, B.S.; Jin, Y.G.; Huang, J.Q.; Su, D.S.; Wei, F. Toward Full Exposure of "Active Sites": Nanocarbon Electrocatalyst with Surface Enriched Nitrogen for Superior Oxygen Reduction and Evolution Reactivity. *Adv. Funct. Mater.* **2014**, *24*, 5956–5961. <https://doi.org/10.1002/adfm.201401264>.
5. Ban, J.J.; Xu, G.C.; Zhang, L.; Xu, G.; Yang, L.J.; Sun, Z.P.; Jia, D.Z. Efficient Co-N/PC@CNT bifunctional electrocatalytic materials for oxygen reduction and oxygen evolution reactions based on metal-organic frameworks. *Nanoscale* **2018**, *10*, 9077–9086. <https://doi.org/10.1039/c8nr01457d>.
6. Qiao, X.; Jin, J.; Luo, J.; Fan, H.; Cui, L.; Wang, W.; Liu, D.; Liao, S. In-situ formation of N doped hollow graphene Nanospheres/CNTs architecture with encapsulated Fe<sub>3</sub>C@C nanoparticles as efficient bifunctional oxygen electrocatalysts. *J. Alloy Compd.* **2020**, *828*, 154238. <https://doi.org/10.1016/j.jallcom.2020.154238>.
7. Xiao, J.; Chen, C.; Xi, J.; Xu, Y.; Xiao, F.; Wang, S.; Yang, S. Core-shell Co@Co<sub>3</sub>O<sub>4</sub> nanoparticle-embedded bamboo-like nitrogen-doped carbon nanotubes (BNCNTs) as a highly active electrocatalyst for the oxygen reduction reaction. *Nanoscale* **2015**, *7*, 7056–7064.
8. Li, Y.H.; Zang, K.T.; Duan, X.Z.; Luo, J.; Chen, D. Boost oxygen reduction reaction performance by tuning the active sites in Fe-N-P-C catalysts. *J. Energy Chem.* **2021**, *55*, 572–579. <https://doi.org/10.1016/j.jechem.2020.07.041>.
9. Li, T.F.; Li, M.; Zhang, M.R.; Li, X.; Liu, K.H.; Zhang, M.Y.; Liu, X.; Sun, D.M.; Xu, L.; Zhang, Y.W.; et al. Immobilization of Fe<sub>3</sub>N nanoparticles within N-doped carbon nanosheet frameworks as a high-efficiency electrocatalyst for oxygen reduction reaction in Zn-air batteries. *Carbon* **2019**, *153*, 364–371. <https://doi.org/10.1016/j.carbon.2019.07.044>.
10. Chen, D.; Li, G.F.; Chen, X.; Li, C.J.; Zhang, Y.C.; Hu, J.; Yu, J.H.; Yu, L.Y.; Dong, L.F. CoFeNi/N-codoped carbon nanotubes with small diameters derived from spherical Prussian blue analog as bifunctional oxygen electrocatalysts for rechargeable Zn-air batteries. *J. Alloy Compd.* **2022**, *910*, 164964. <https://doi.org/ARTN164964,10.1016/j.jallcom.2022.164964>.
11. Deng, Y.J.; Tian, X.L.; Chi, B.; Wang, Q.Y.; Ni, W.P.; Gao, Y.; Liu, Z.E.; Luo, J.M.; Lin, C.X.; Ling, L.M.; et al. Hierarchically open-porous carbon networks enriched with exclusive Fe-N-x active sites as efficient oxygen reduction catalysts towards acidic H<sub>2</sub>-O<sub>2</sub> PEM fuel cell and alkaline Zn-air battery. *Chem. Eng. J.* **2020**, *390*, 124479. <https://doi.org/ArtN124479,10.1016/J.Cej.2020.124479>.
12. Wang, Q.; Ji, Y.; Lei, Y.; Wang, Y.; Wang, Y.; Li, Y.; Wang, S. Pyridinic-N-Dominated Doped Defective Graphene as a Superior Oxygen Electrocatalyst for Ultrahigh-Energy-Density Zn-Air Batteries. *ACS Energy Lett.* **2018**, *3*, 1183–1191. <https://doi.org/10.1021/acsenergylett.8b00303>.
13. Yang, T.F.; Chen, Y.; Liu, Y.; Liu, X.P.; Gao, S.Y. Self-sacrificial template synthesis of Fe, N co-doped porous carbon as efficient oxygen reduction electrocatalysts towards Zn-air battery application. *Chin. Chem. Lett.* **2022**, *33*, 2171–2177. <https://doi.org/10.1016/j.ccllet.2021.09.014>.
